# Supplementary material for: Between Joy and Sympathy: Smiling and Sad Recipient Faces Increase Prosocial Behavior in the Dictator Game
Source: MDPI journal article supplement (doi:10.3390/ijerph18116172), 2021-06-07
Supplement: s1 [file s1]

## Supplementary Materials

**Table S1.** Fixed effects omnibus test for the trial-by-trial analysis on dictator behavior

|                                   | <i>F</i> -value | Num DF | <i>p</i> -value |
|-----------------------------------|-----------------|--------|-----------------|
| Identity                          | 26.15           | 4      | < .001          |
| EC                                | .75             | 1      | .388            |
| previous identity                 | .74             | 4      | .565            |
| previous decision                 | 8.59            | 1      | .003            |
| identity × previous identity      | .65             | 16     | .846            |
| identity × EC                     | .92             | 4      | .453            |
| previous identity × EC            | .45             | 4      | .773            |
| identity × previous decision      | 4.12            | 4      | .003            |
| EC × previous decision            | .08             | 1      | .773            |
| identity × previous identity × EC | .80             | 16     | .688            |
| identity × previous decision × EC | 5.35            | 4      | < .001          |

Note. EC = empathic concern; Num DF = number of degrees of freedom

**Table S2.** Intercept and fixed effects parameters for the trial-by-trial analysis on dictator behavior

| Fixed effects                  | Values | SE  | <i>t</i> -value | <i>p</i> -value |
|--------------------------------|--------|-----|-----------------|-----------------|
| (intercept)                    | 4.64   | .14 | 34.11           | < .001          |
| smiling                        | .73    | .15 | 4.94            | < .001          |
| sad                            | .29    | .15 | 1.99            | .049            |
| angry                          | -.86   | .14 | -6.13           | < .001          |
| disgusted                      | -1.39  | .15 | -9.06           | < .001          |
| previous_smiling               | .01    | .08 | .10             | .921            |
| previous_sad                   | .05    | .08 | .57             | .569            |
| previous_angry                 | .11    | .08 | 1.30            | .193            |
| previous_disgusted             | .12    | .09 | 1.39            | .166            |
| EC                             | .12    | .14 | .87             | .388            |
| previous decision              | .12    | .04 | 2.93            | .003            |
| smiling × previous_smiling     | .11    | .27 | .41             | .678            |
| smiling × previous_sad         | -.33   | .26 | -1.25           | .212            |
| smiling × previous_angry       | -.02   | .25 | -.10            | .922            |
| smiling × previous_disgusted   | -.13   | .27 | -.49            | .626            |
| sad × previous_smiling         | .18    | .26 | .69             | .492            |
| sad × previous_sad             | -.27   | .27 | -1.01           | .312            |
| sad × previous_angry           | .03    | .26 | .11             | .915            |
| sad × previous_disgusted       | .33    | .28 | 1.16            | .245            |
| angry × previous_smiling       | .12    | .26 | .46             | .648            |
| angry × previous_sad           | -.22   | .26 | -.82            | .412            |
| angry × previous_angry         | .00    | .27 | -.01            | .989            |
| angry × previous_disgusted     | -.13   | .27 | -.47            | .637            |
| disgusted × previous_smiling   | -.10   | .26 | -.37            | .711            |
| disgusted × previous_sad       | -.31   | .26 | -1.19           | .235            |
| disgusted × previous_angry     | -.16   | .27 | -.60            | .549            |
| disgusted × previous_disgusted | -.01   | .28 | -.04            | .968            |
| EC × previous decision         | .01    | .04 | .29             | .773            |
| smiling × EC                   | .03    | .15 | .21             | .835            |
| sad × EC                       | .05    | .15 | .32             | .752            |

|                                     |      |     |       |      |
|-------------------------------------|------|-----|-------|------|
| angry × EC                          | -.02 | .14 | -.15  | .881 |
| disgusted × EC                      | -.23 | .16 | -1.50 | .137 |
| previous_smiling × EC               | .00  | .09 | .00   | .999 |
| previous_sad × EC                   | .04  | .08 | .43   | .665 |
| previous_angry × EC                 | .10  | .09 | 1.10  | .270 |
| previous_disgusted × EC             | .08  | .09 | .87   | .382 |
| smiling × previous decision         | .18  | .11 | 1.67  | .096 |
| sad × previous decision             | .22  | .11 | 1.97  | .049 |
| angry × previous decision           | -.18 | .10 | -1.80 | .072 |
| disgusted × previous decision       | .10  | .11 | .97   | .332 |
| smiling × previous_smiling × EC     | .46  | .30 | 1.54  | .123 |
| smiling × previous_sad × EC         | .26  | .26 | .99   | .324 |
| smiling × previous_angry × EC       | .17  | .26 | .66   | .512 |
| smiling × previous_disgusted × EC   | -.02 | .28 | -.07  | .945 |
| sad × previous_smiling × EC         | .35  | .26 | 1.31  | .190 |
| sad × previous_sad × EC             | .03  | .28 | .12   | .908 |
| sad × previous_angry × EC           | .09  | .26 | .36   | .721 |
| sad × previous_disgusted × EC       | .25  | .29 | .86   | .387 |
| angry × previous_smiling × EC       | .61  | .27 | 2.28  | .023 |
| angry × previous_sad × EC           | .54  | .26 | 2.06  | .040 |
| angry × previous_angry × EC         | .52  | .29 | 1.81  | .070 |
| angry × previous_disgusted × EC     | .34  | .27 | 1.26  | .209 |
| disgusted × previous_smiling × EC   | .52  | .28 | 1.87  | .062 |
| disgusted × previous_sad × EC       | .28  | .28 | 1.01  | .314 |
| disgusted × previous_angry × EC     | .39  | .29 | 1.34  | .179 |
| disgusted × previous_disgusted × EC | .37  | .30 | 1.23  | .218 |
| smiling × previous decision × EC    | -.10 | .11 | -.92  | .358 |
| sad × previous decision × EC        | .19  | .12 | 1.60  | .109 |
| angry × previous decision × EC      | -.22 | .11 | -2.05 | .041 |
| disgusted × previous decision × EC  | .14  | .11 | 1.23  | .221 |

*Note.* EC = empathic concern
